# Supplementary material for: Characterization of HBV integration patterns and timing in liver cancer and HBV-infected livers
Source: PubMed Central journal article supplement (PMC5982772; doi:10.18632/oncotarget.25308), 2018-05-18
Supplement: oncotarget-09-25075-s001.pdf [file oncotarget-09-25075-s001.pdf]

# Characterization of HBV integration patterns and timing in liver cancer and HBV-infected livers

## SUPPLEMENTARY MATERIALS

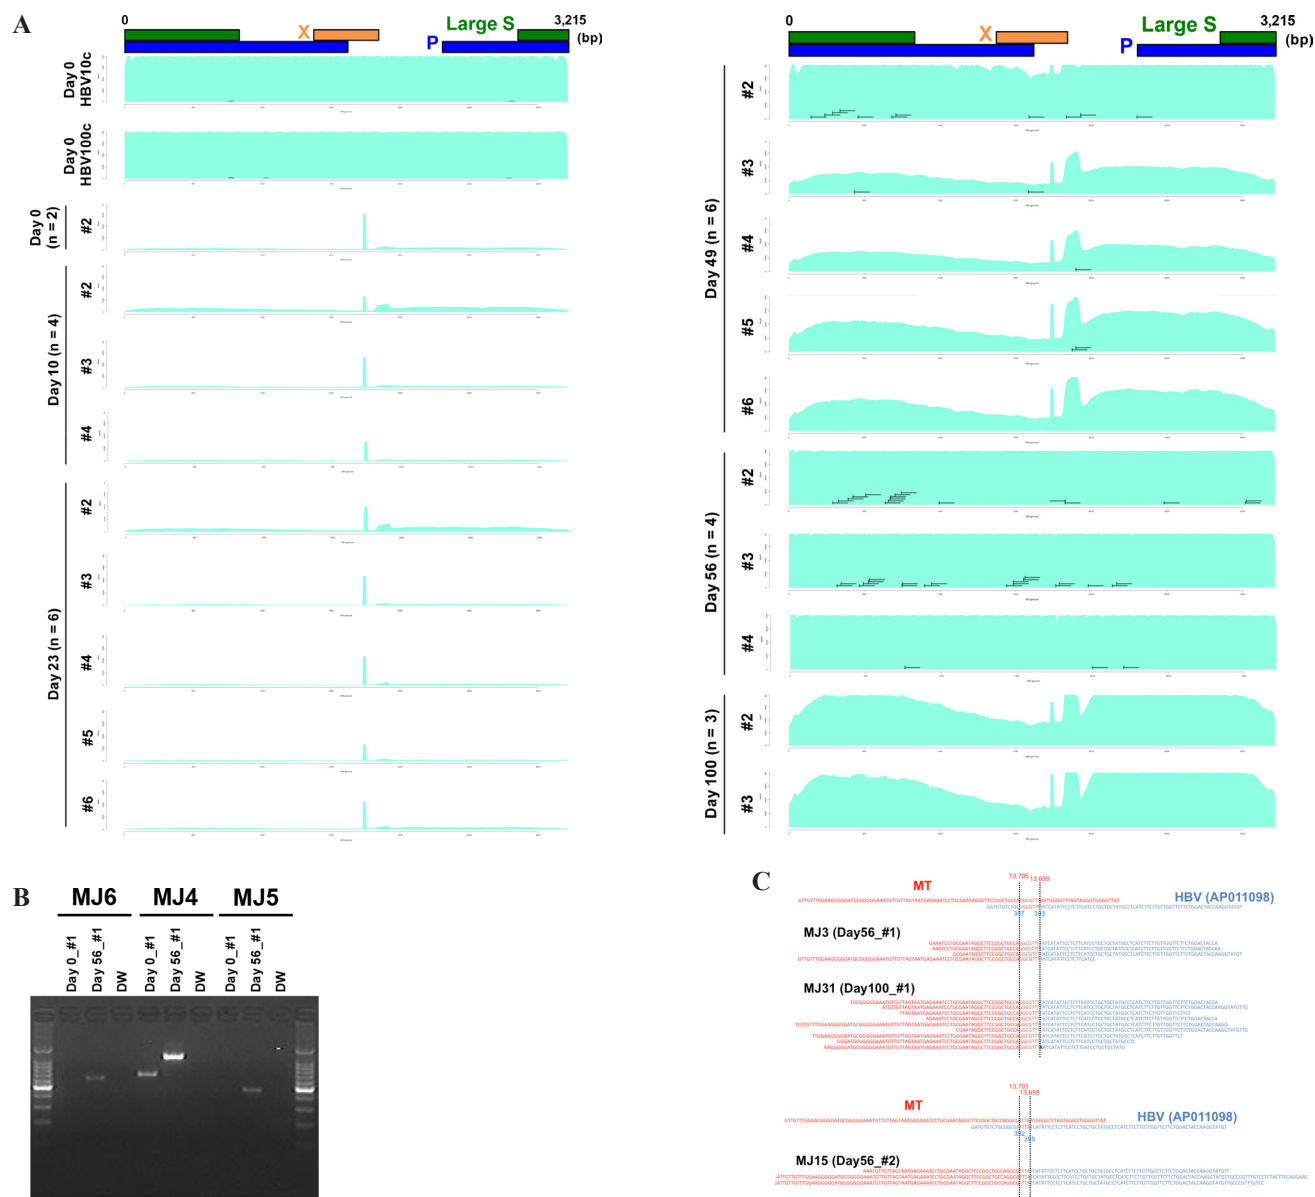

**Supplementary Figure 1:** (A) Coverage of HBV genome (light green) and integration sites (black bars) in HBV-Capture-Seq. Junctions of HBV are shown as vertical bars, with part of the remaining integrated sequence (35bp) indicated as horizontal lines. Remaining samples were shown in Figure 1A. (B) Representative example of verification of HBV integration by junction-specific PCR. Junction-specific PCR were performed as shown previously (ref). Detailed information of each junction was shown in Supplementary Table 3. (C) Example of break points between HBV and MT (mtDNA). Red, blue and yellow characters' indicating sequence of MT, HBV, and micro homology shared between MT and HBV. Day 56\_#1 and Day 100\_#1 shared identical junction sequence (MJ3 and MJ31) although there are derived from different mice, and junction MJ15 from Day 56\_#2 were derived from very close combination of locus with MJ3 and MJ31.

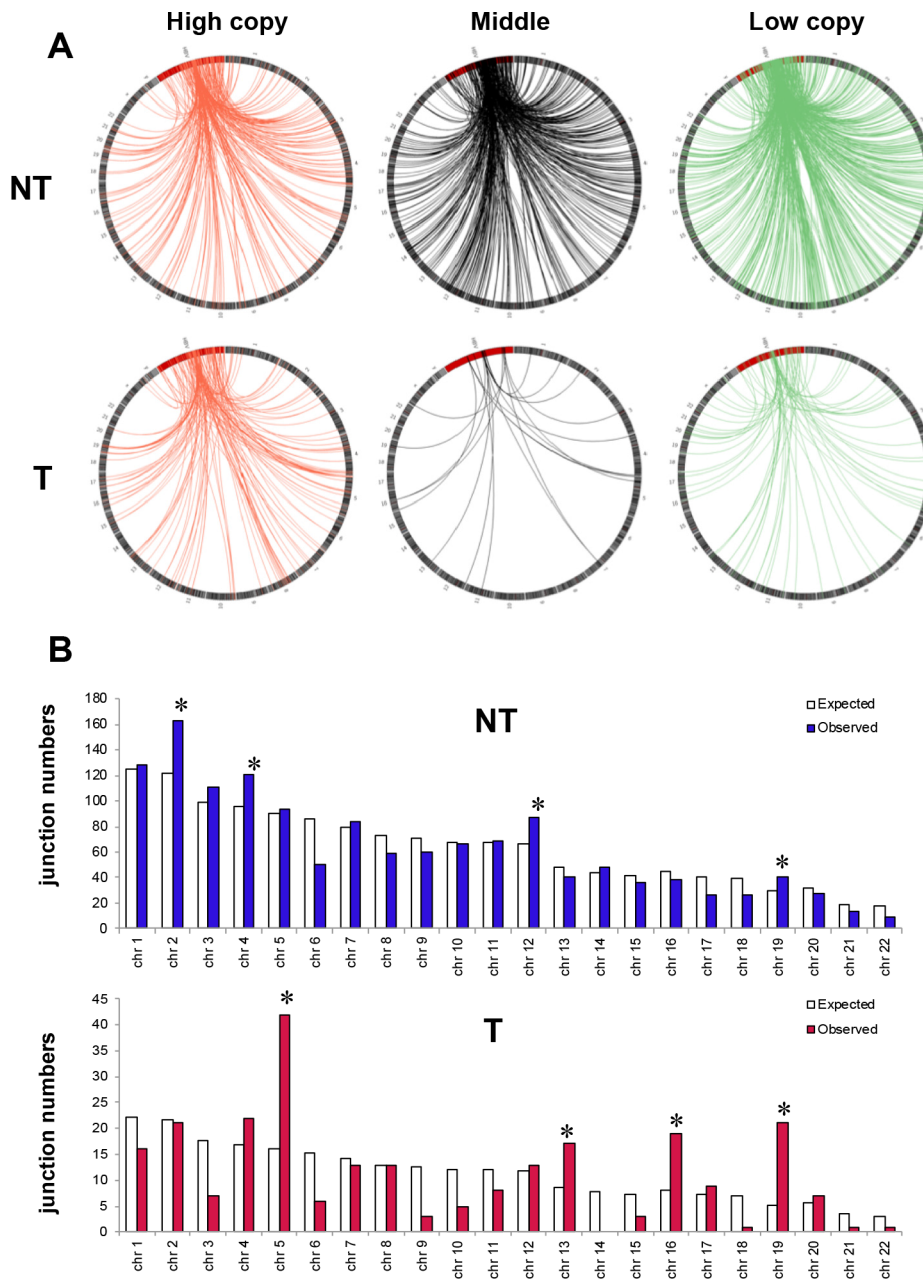

**Supplementary Figure 2: (A)** Circos plot showing the distribution of integration sites in the HBV genome (Red bars) and human chromosomes (Black bars). High copy, Low copy and middle indicate junctions with read counts over 50, under 10, and others respectively. **(B)** Expected (white bars) and observed (colored bars) numbers of HBV junctions in each chromosomes. Expected number of junctions were normalized with the length of each chromosome. \* $P < 0.05$ .

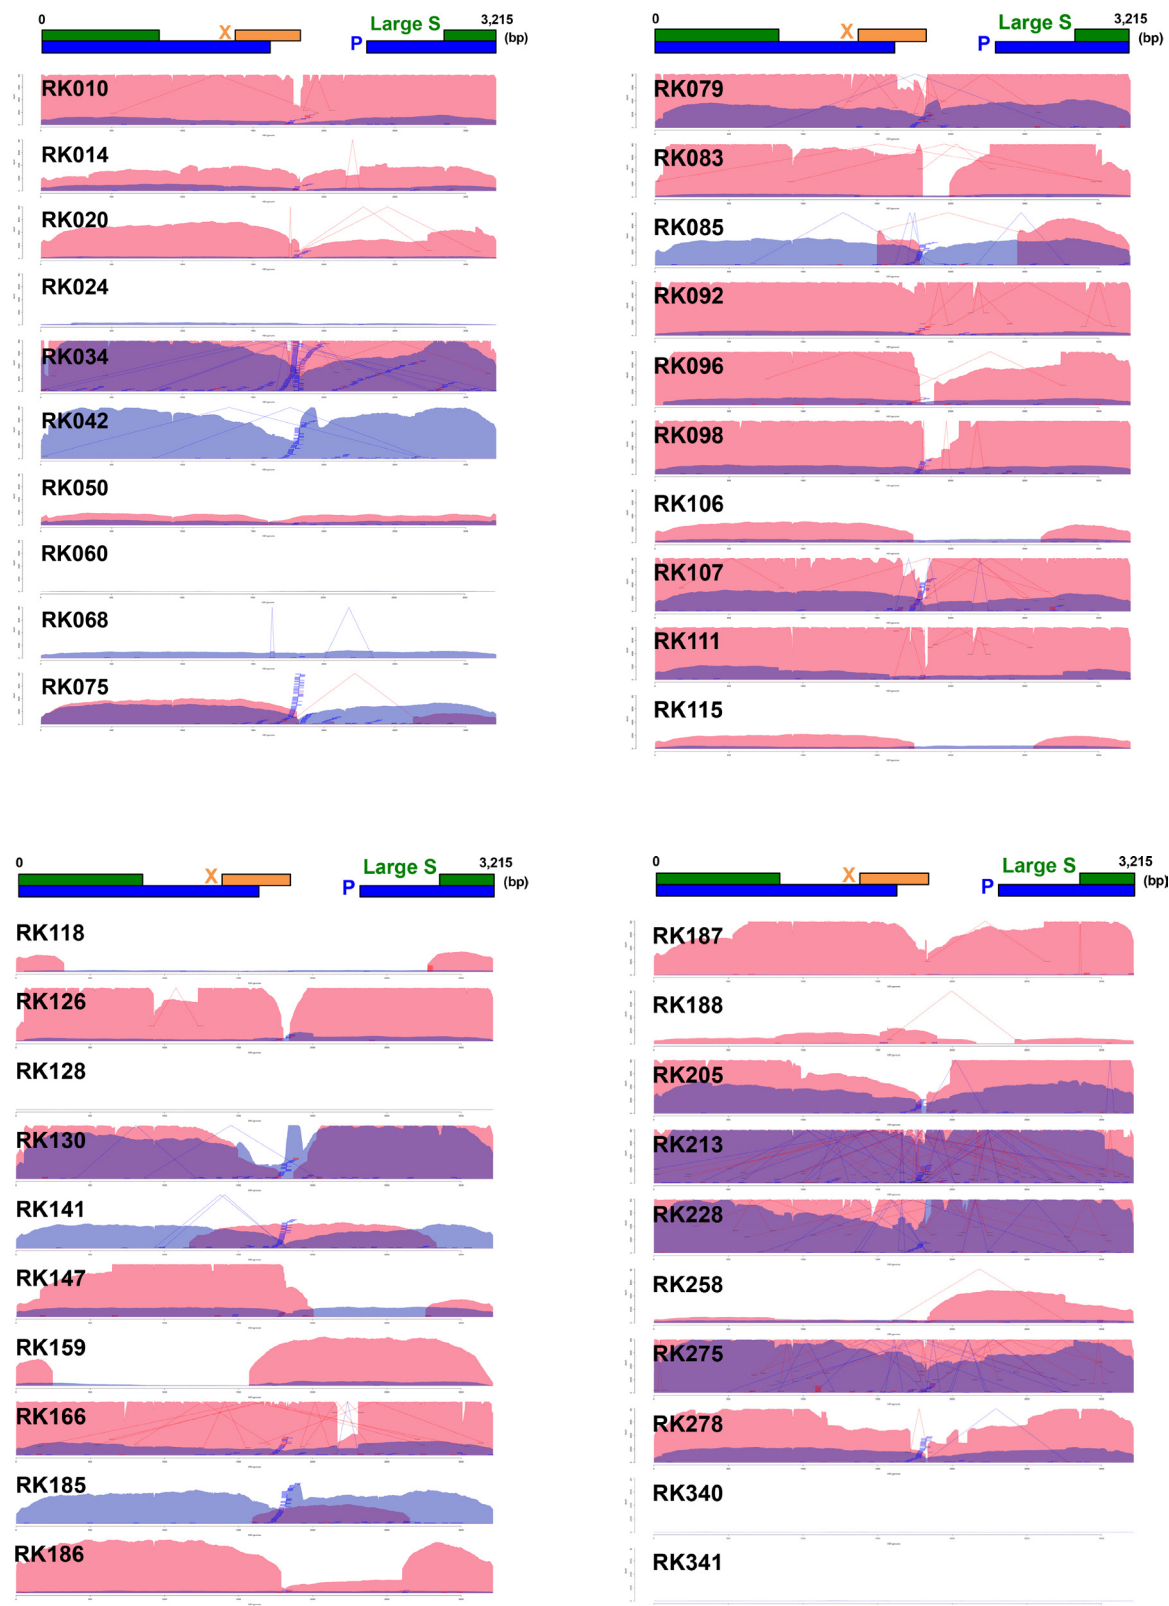

**Supplementary Figure 3: Depth of coverage for HBV genome and integration sites in HBV-Capture-Seq.** Blue and pink indicate the HBV depth in non-tumor and tumors. Blue and red bars indicate junctions in liver and cancers. Junctions of HBV are shown as vertical bars, with part of the remaining integrated sequence (35bp) indicated as horizontal lines. Positions of structural variations within HBVs were shown as connected lines.

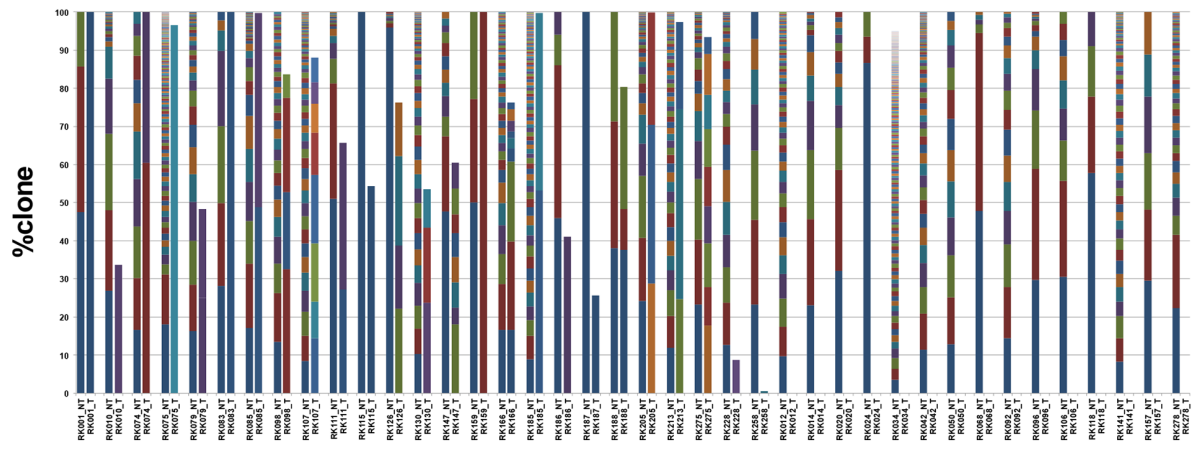

**Supplementary Figure 4: Clonal proportion of HBV junctions.** Proportion of each junctions detected in NT were shown. Same colored block indicates the shared junction between NT and T.

**A**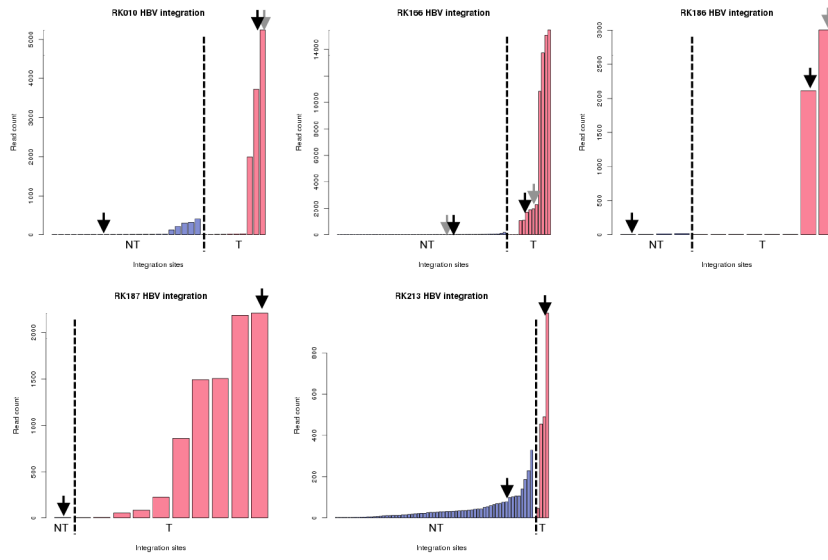**B**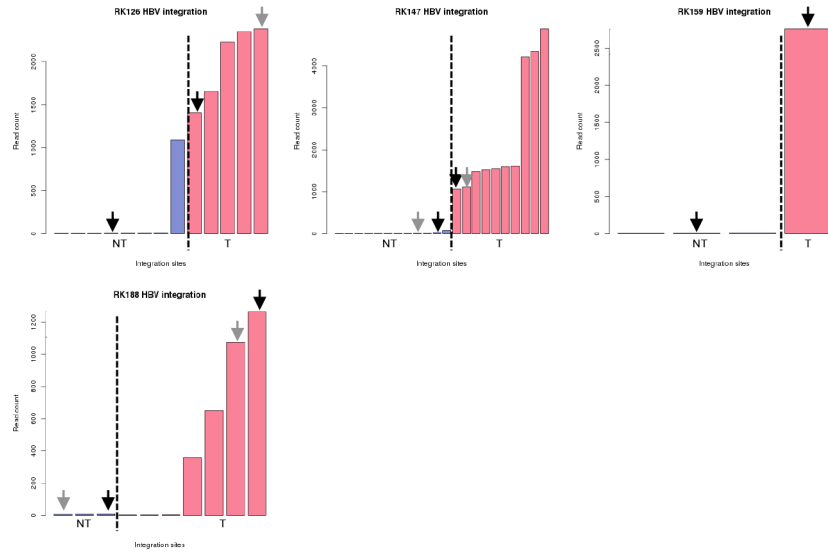

**Supplementary Figure 5:** Read counts of human-EBV junctions detected in non-tumor (NT, blue bars) and tumors (T, pink bars) in samples harboring EBV integrations in *TERT* (A) and *MLL4* (B) in both NT and T. Arrows indicate junctions in *TERT* or *MLL4*. Black and gray arrows are 5' or 3' side pairs of junctions.

**Supplementary Table 1: Sample list of HBV infection model of human hepatocyte chimeric mice**

| <b>Sample ID</b> | <b>DNA sample</b> | <b>Days after infection</b> | <b>Description</b>  | <b>HBV copy (IU/mL)</b> |
|------------------|-------------------|-----------------------------|---------------------|-------------------------|
| Day 0_#1         | PXB0264-0004      | None                        | liver DNA           | ND                      |
| Day 0_#2         | PXB0264-0005      | None                        | liver DNA           | ND                      |
| Day 10_#1        | PXB0282-0025      | 10                          | liver DNA           | 9.00E+05                |
| Day 10_#2        | PXB0282-0026      | 10                          | liver DNA           | 2.50E+05                |
| Day 10_#3        | PXB0282-0003      | 10                          | liver DNA           | 9.60E+04                |
| Day 10_#4        | PXB0282-0003      | 10                          | liver DNA           | 9.60E+04                |
| Day 23_#1        | HSB0109-0025_1    | 23                          | liver DNA           | 1.77E+04                |
| Day 23_#2        | HSB0109-0025_2    | 23                          | liver DNA           | 1.77E+04                |
| Day 23_#3        | HSB0109-0072_1    | 23                          | liver DNA           | 1.00E+03                |
| Day 23_#4        | HSB0109-0072_2    | 23                          | liver DNA           | 1.00E+03                |
| Day 23_#5        | HSB0109-0074_1    | 23                          | liver DNA           | 1.61E+03                |
| Day 23_#6        | HSB0109-0074_2    | 23                          | liver DNA           | 1.61E+03                |
| Day 49_#1        | HSB0109-0005_1    | 49                          | liver DNA           | 9.91E+04                |
| Day 49_#2        | HSB0109-0005_3    | 49                          | liver DNA           | 9.91E+04                |
| Day 49_#3        | HSB0109-0069_1    | 49                          | liver DNA           | 3.16E+04                |
| Day 49_#4        | HSB0109-0069_2    | 49                          | liver DNA           | 3.16E+04                |
| Day 49_#5        | HSB0109-0070_1    | 49                          | liver DNA           | 4.86E+04                |
| Day 49_#6        | HSB0109-0070_2    | 49                          | liver DNA           | 4.86E+04                |
| Day 56_#1        | PXB0282-0004      | 56                          | liver DNA           | 1.40E+10                |
| Day 56_#2        | PXB0282-0001      | 56                          | liver DNA           | 1.00E+10                |
| Day 56_#3        | PXB0282-0005_1    | 56                          | liver DNA           | 6.1E+09                 |
| Day 56_#4        | PXB0282-0005_2    | 56                          | liver DNA           | 6.1E+09                 |
| Day 100_#1       | PXB0317-0070      | 100                         | liver DNA           | 5.00E+08                |
| Day 100_#2       | PXB0200-063       | 100                         | liver DNA           | 4.80E+07                |
| Day 100_#3       | PXB0244-0042      | 100                         | liver DNA           | 1.9E+08                 |
| Day 0_HBV10c     | PXB0264-0005      | None                        | liver DNA + HBV DNA | ND                      |
| Day 0_HBV100c    | PXB0264-0005      | None                        | liver DNA + HBV DNA | ND                      |

**Supplementary Table 2: HBV integrations in human hepatocyte chimeric mice infected with HBV**

See Supplementary File 1

**Supplementary Table 3: Clinical and pathological information of human liver tissues**

See Supplementary File 1

**Supplementary Table 4: Summary of HBV-capture sequencing**

See Supplementary File 1

**Supplementary Table 5: HBV integrations in HBV infected samples**

See Supplementary File 1

**Supplementary Table 6: List of gene-related regions harboring shared junctions between NT and T**

| <b>Gene name</b>    | <b>Number of cases</b> | <b>Case names*</b>                                   |
|---------------------|------------------------|------------------------------------------------------|
| <i>TERT</i>         | 5                      | RK010 (p), RK166 (i), RK186 (i), RK187 (i),RK213 (i) |
| <i>KMT2B(MLL4)</i>  | 4                      | RK126 (e), RK147 (e), RK159 (e), RK188(i)            |
| <i>ADAMTS6</i>      | 1                      | RK098 (i)                                            |
| <i>ANKRD17</i>      | 1                      | RK075 (i)                                            |
| <i>C1orf168</i>     | 1                      | RK130 (i)                                            |
| <i>CCNA2</i>        | 1                      | RK107 (i)                                            |
| <i>CPA6</i>         | 1                      | RK147 (i)                                            |
| <i>DOK5</i>         | 1                      | RK098 (i)                                            |
| <i>EML4</i>         | 1                      | RK111 (i)                                            |
| <i>FSIP2</i>        | 1                      | RK205 (i)                                            |
| <i>HEATR6</i>       | 1                      | RK079 (e)                                            |
| <i>HPR</i>          | 1                      | RK130 (p)                                            |
| <i>LOC100506421</i> | 1                      | RK107 (i)                                            |
| <i>MAP4K2</i>       | 1                      | RK213 (p)                                            |
| <i>NKAIN3</i>       | 1                      | RK085 (i)                                            |
| <i>PLXDC2</i>       | 1                      | RK147 (i)                                            |
| <i>REXO1</i>        | 1                      | RK275 (i)                                            |
| <i>RGS12</i>        | 1                      | RK126 (i)                                            |
| <i>SEMA3C</i>       | 1                      | RK228 (i)                                            |
| <i>SEMA6B</i>       | 1                      | RK107(e)                                             |
| <i>SFMBT2</i>       | 1                      | RK083 (i)                                            |
| <i>THSD4</i>        | 1                      | RK107 (i)                                            |
| <i>TPPP</i>         | 1                      | RK115 (i)                                            |
| <i>USP9Y</i>        | 1                      | RK205 (i)                                            |

\*(p): promoter, (i):intron, (e):exon



**Supplementary Table 7: List of integrations in genes with fusion transcripts**

| Gene name           | Numbers of cases with* |         | Sample names                                                                   |
|---------------------|------------------------|---------|--------------------------------------------------------------------------------|
|                     | integrations           | fusions |                                                                                |
| <i>FN1</i>          | 14                     | 8       | RK014_NT, RK034_NT, RK079_NT, RK085_NT, RK098_NT, RK107_NT, RK130_NT, RK228_NT |
| <i>KMT2B(MLL4)</i>  | 6                      | 5       | RK014_T, RK092_T, RK126_T, RK147_T, RK159_T                                    |
| <i>TERT</i>         | 9                      | 2       | RK010_T, RK187_T                                                               |
| <i>ALB</i>          | 2                      | 2       | RK034_NT, RK092_NT                                                             |
| <i>LOC100506421</i> | 3                      | 1       | RK107_T                                                                        |
| <i>DOK5</i>         | 2                      | 1       | RK098_T                                                                        |
| <i>HS6ST3</i>       | 2                      | 1       | RK096_T                                                                        |
| <i>C1orf168</i>     | 2                      | 1       | RK130_T                                                                        |
| <i>CCNA2</i>        | 2                      | 1       | RK107_T                                                                        |
| <i>CPA6</i>         | 1                      | 1       | RK147_T                                                                        |
| <i>RGS12</i>        | 1                      | 1       | RK126_T                                                                        |
| <i>ATXN7L1</i>      | 1                      | 1       | RK213_NT                                                                       |
| <i>RB1CC1</i>       | 1                      | 1       | RK106_T                                                                        |
| <i>PPP2R2B</i>      | 1                      | 1       | RK034_NT                                                                       |
| <i>VKORC1L1</i>     | 1                      | 1       | RK012_NT                                                                       |
| <i>CDK15</i>        | 1                      | 1       | RK050_T                                                                        |
| <i>RBP4</i>         | 1                      | 1       | RK130_NT                                                                       |
| <i>NOS1</i>         | 1                      | 1       | RK079_NT                                                                       |
| <i>USP9Y</i>        | 1                      | 1       | RK205_T                                                                        |
| <i>GRIA1</i>        | 1                      | 1       | RK034_NT                                                                       |
| <i>PRKG1</i>        | 1                      | 1       | RK075_NT                                                                       |
| <i>CDK13</i>        | 1                      | 1       | RK141_NT                                                                       |
| <i>TPPP</i>         | 1                      | 1       | RK115_T                                                                        |
| <i>NUP153</i>       | 1                      | 1       | RK107_NT                                                                       |
| <i>KHDRBS3</i>      | 1                      | 1       | RK141_NT                                                                       |
| <i>KCNIP4</i>       | 1                      | 1       | RK141_NT                                                                       |
| <i>TEKT3</i>        | 1                      | 1       | RK098_T                                                                        |

\*Cases number were calculated for samples with available RNA-Seq data.
